# Supplementary material for: Deep Neural Networks for Dental Implant System Classification
Source: MDPI journal article supplement (doi:10.3390/biom10070984), 2020-07-01

# Deep Neural Networks for Dental Implant System Classification

**Shintaro Sukegawa <sup>1,2,\*</sup>, Kazumasa Yoshii <sup>3</sup>, Takeshi Hara <sup>3</sup>, Katsusuke Yamashita <sup>4</sup>, Keisuke Nakano <sup>2</sup>, Norio Yamamoto <sup>5</sup>, Hitoshi Nagatsuka <sup>2</sup> and Yoshihiko Furuki <sup>1</sup>**

<sup>1</sup> Department of Oral and Maxillofacial Surgery, Kagawa Prefectural Central Hospital, 1-2-1, Asahi-machi, Takamatsu, Kagawa, 760-8557, Japan; [gouwan19@gmail.com](mailto:gouwan19@gmail.com)

<sup>2</sup> Department of Oral Pathology and Medicine, Okayama University Graduate School of Medicine, Dentistry and Pharmaceutical Sciences, Okayama, 700-8558, Japan

<sup>3</sup> Department of Electrical, Electronic and Computer Engineering, Faculty of Engineering, Gifu University, 1-1 Yanagido, Gifu, Gifu, 501-1193, Japan

<sup>4</sup> Polytechnic Center Kagawa, 2-4-3, Hananomiya-cho, Takamatsu, Kagawa 761-8063, Japan

<sup>5</sup> Department of Orthopaedic Surgery, Kagawa Prefectural Central Hospital, Takamatsu, Kagawa, 760-8557, Japan

\* Correspondence: [gouwan19@gmail.com](mailto:gouwan19@gmail.com); Tel.: +81 87 811 3333, Fax: +81 87 835 8363

# Appendix

Figure S1. Mean ROC curves of each CNN models for 11 types of dental implant classification

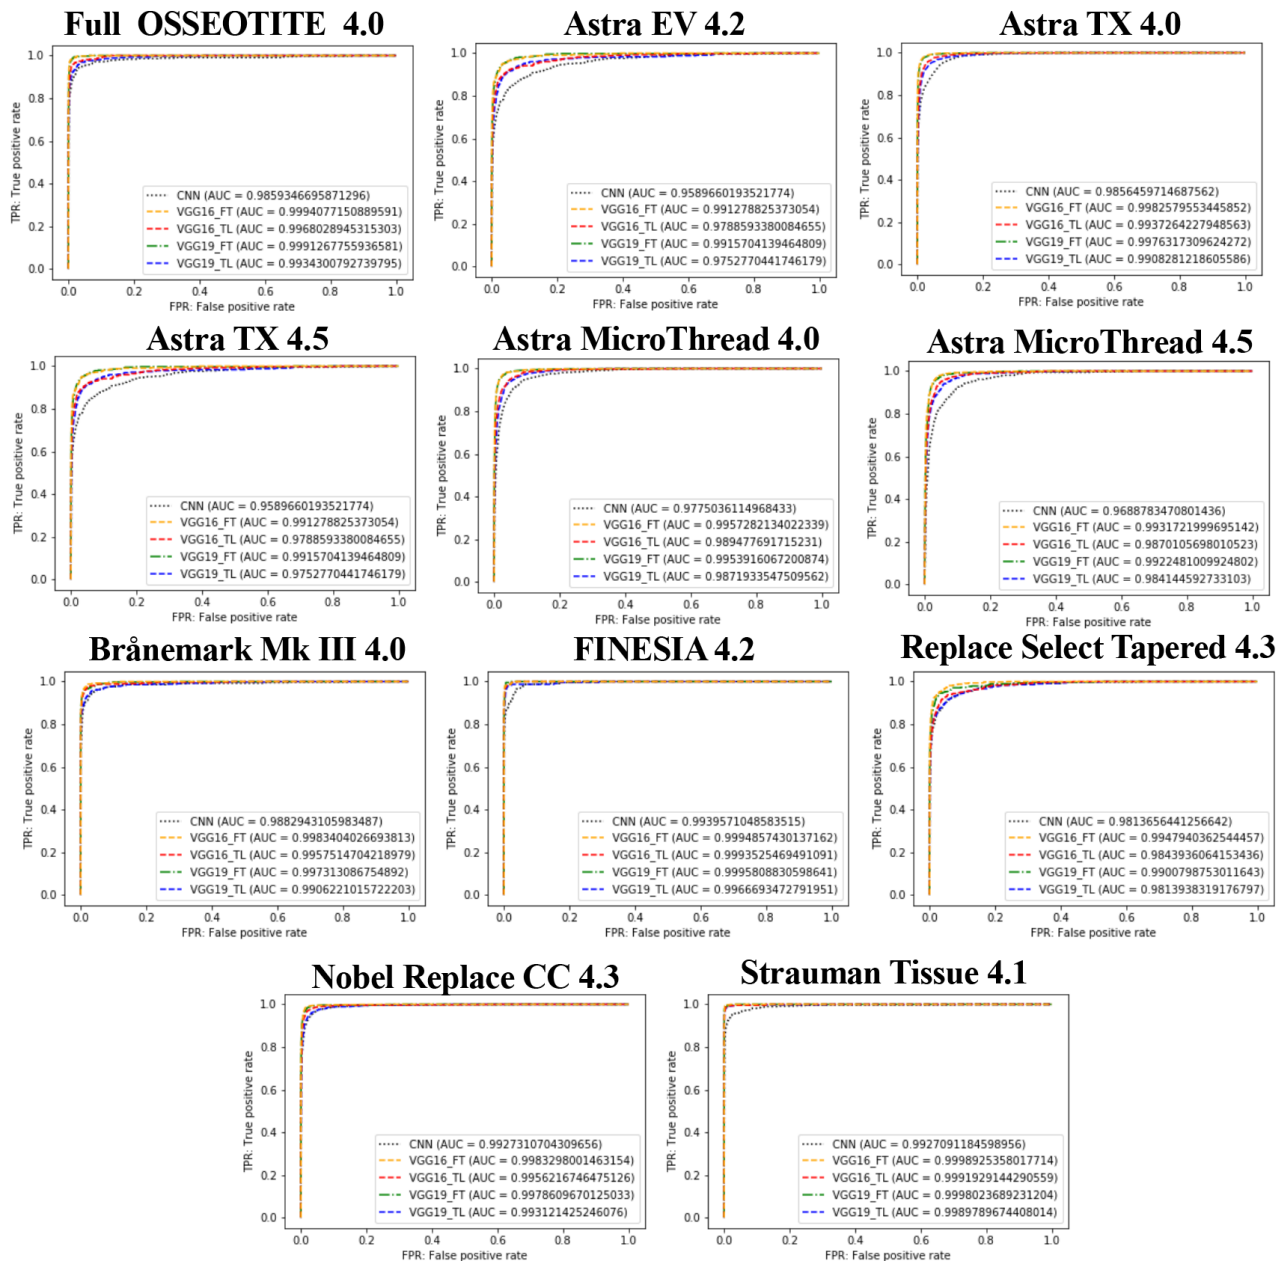

Abbreviation in Figure S1

CNN; Basic CNN model with three convolutional layers (basic CNN)

VGG16\_FT; Fine-tuning VGG16 model with pre-trained weights (VGG16 fine tuning)

VGG16\_TL; Transfer-learning VGG16 model with pre-trained weights (VGG16 transfer)

VGG19\_FT; Fine-tuning VGG19 model with pre-trained weights (VGG19 fine tuning)

VGG19\_TL; Transfer-learning VGG19 model with pre-trained weights (VGG19transfer)

**Figure S2. Visualization of Model Classification**

Figure S2 shows ten representative images of 11 types of dental implants classified using each CNN model, visualized using Grad-CAM.

**Full OSSEOTITE 4.0**

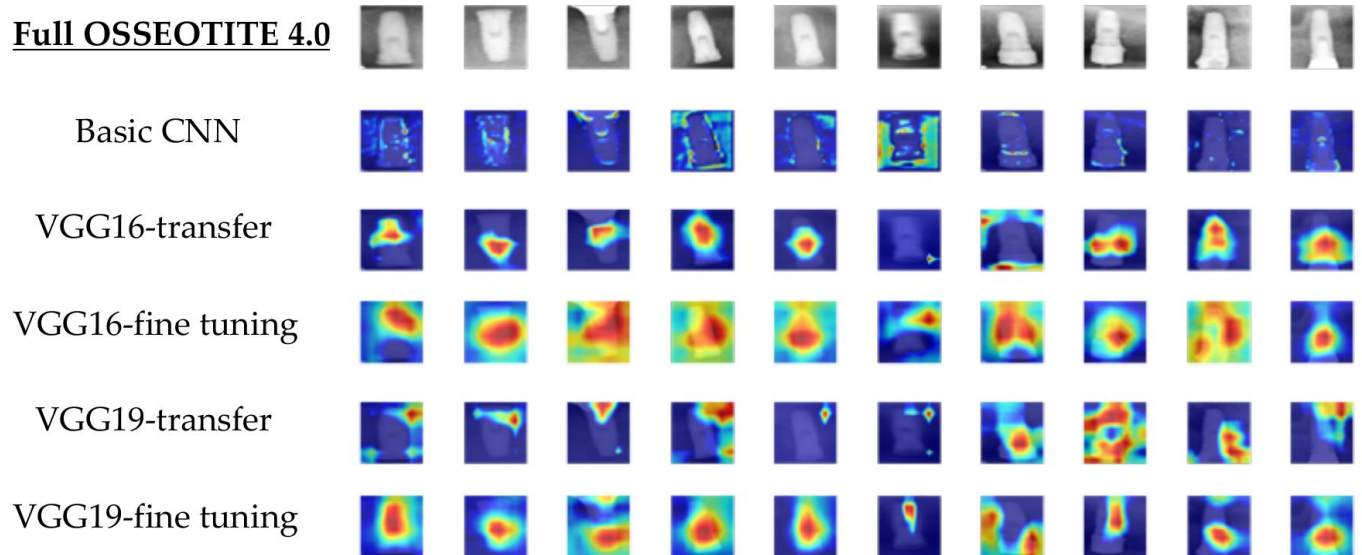

**Astra EV 4.2**

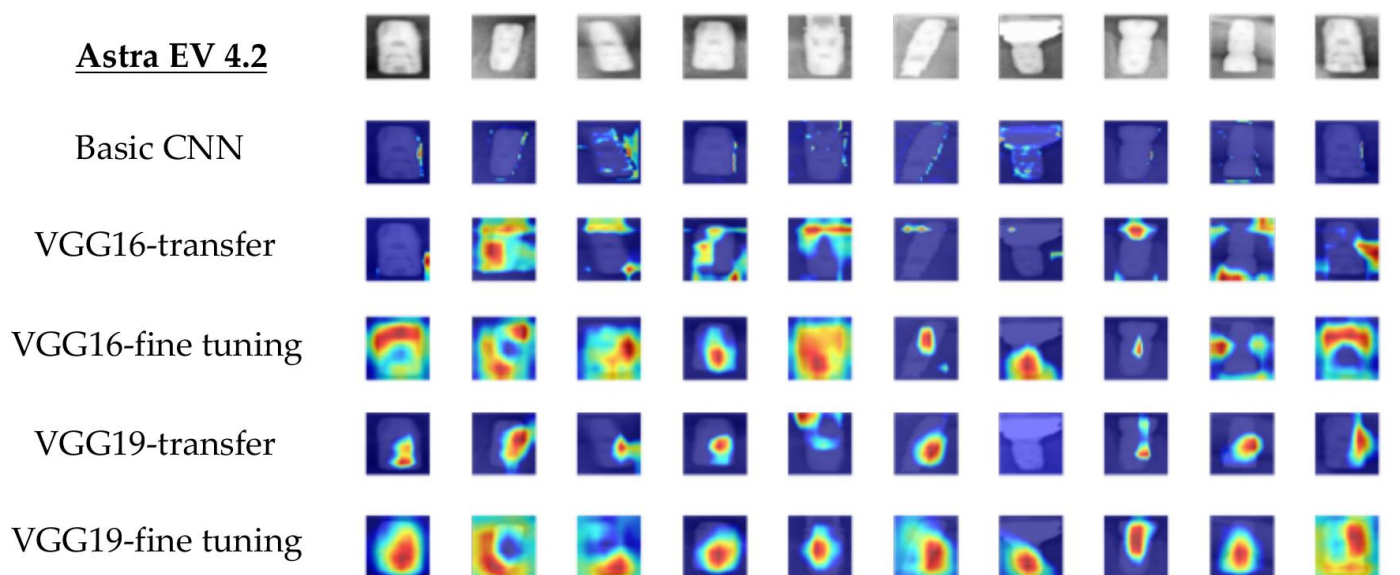

## Astra TX 4.0

### Astra TX 4.0

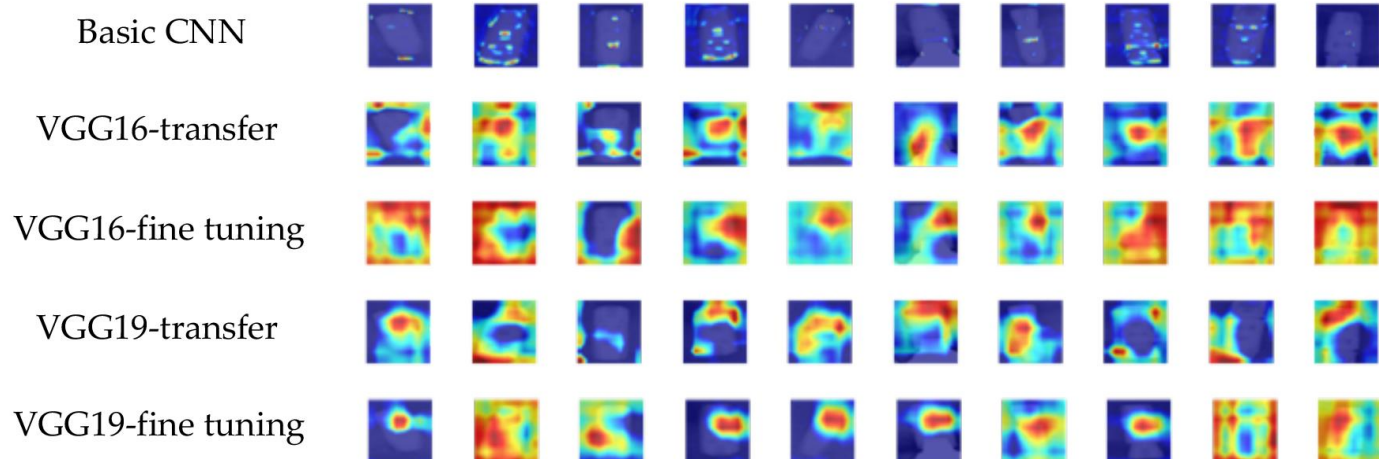

## Astra TX 4.5

### Astra TX 4.5

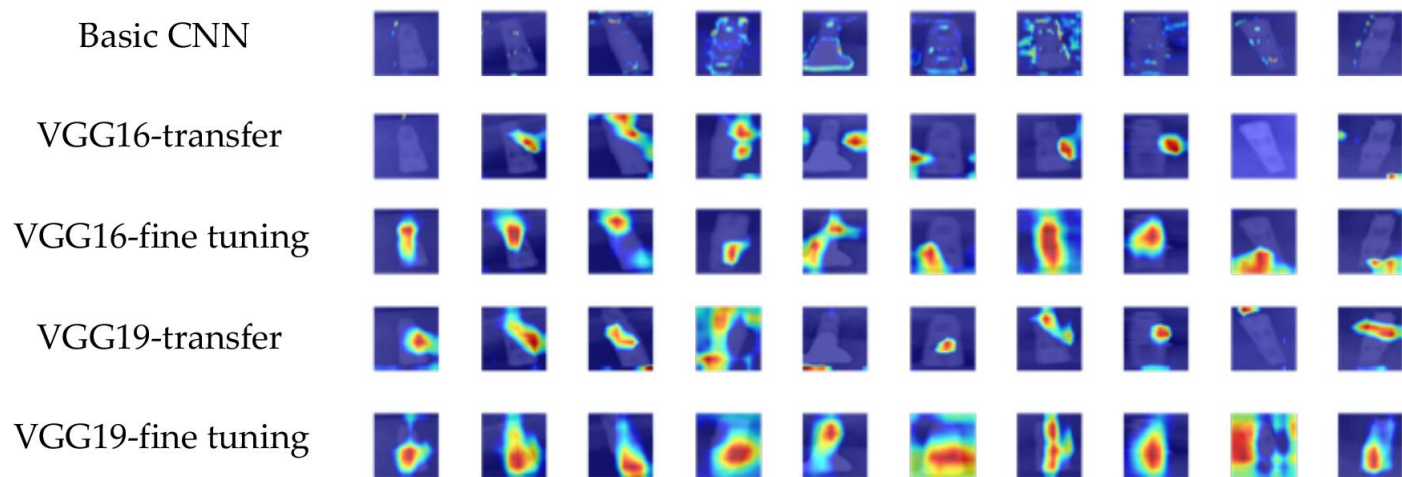

## Astra MicroThread 4.0

### Astra MicroThread 4.0

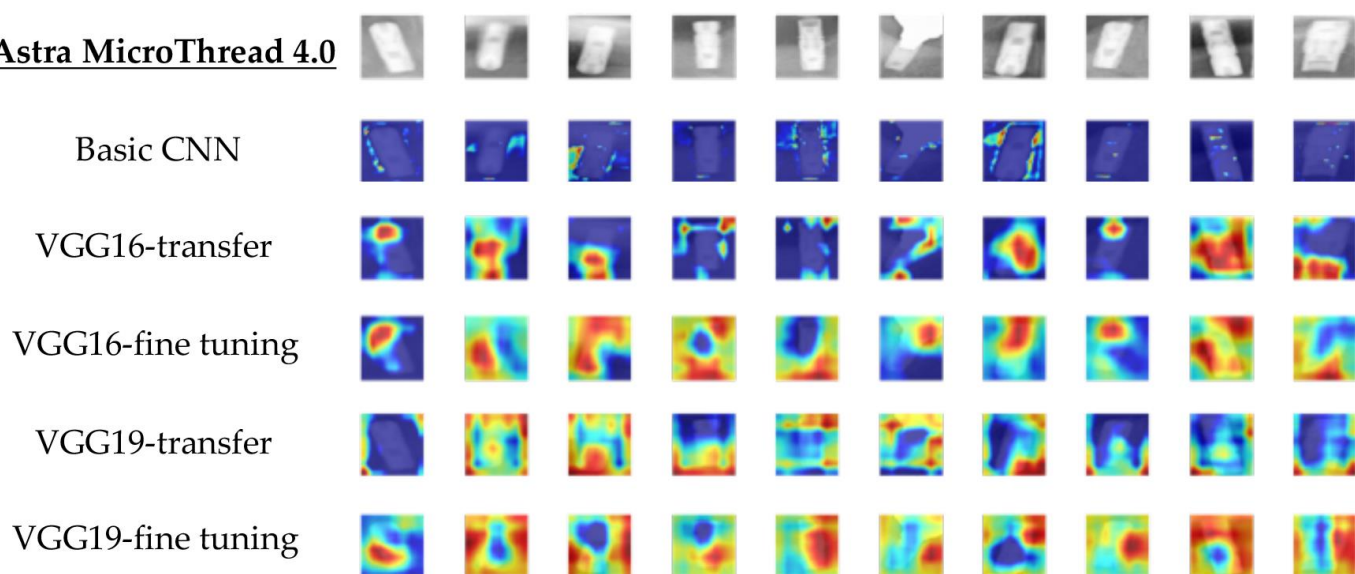

## Astra MicroThread 4.5

### Astra MicroThread 4.5

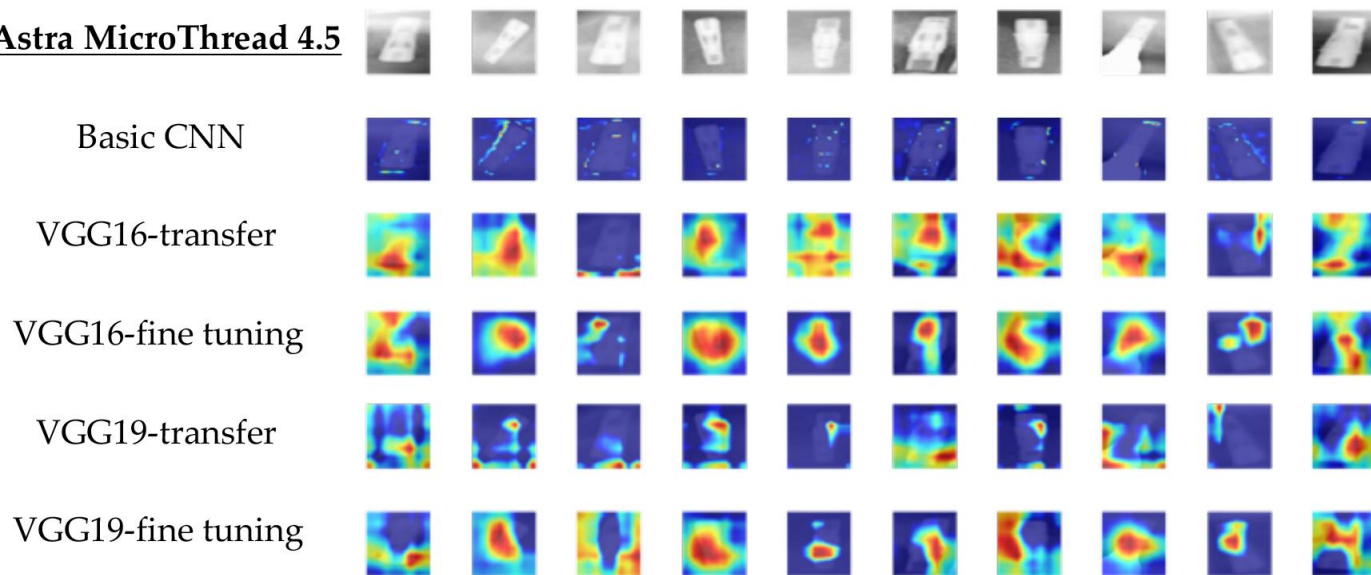



## Brånemark Mk III 4.0

### Brånemark Mk III 4.0

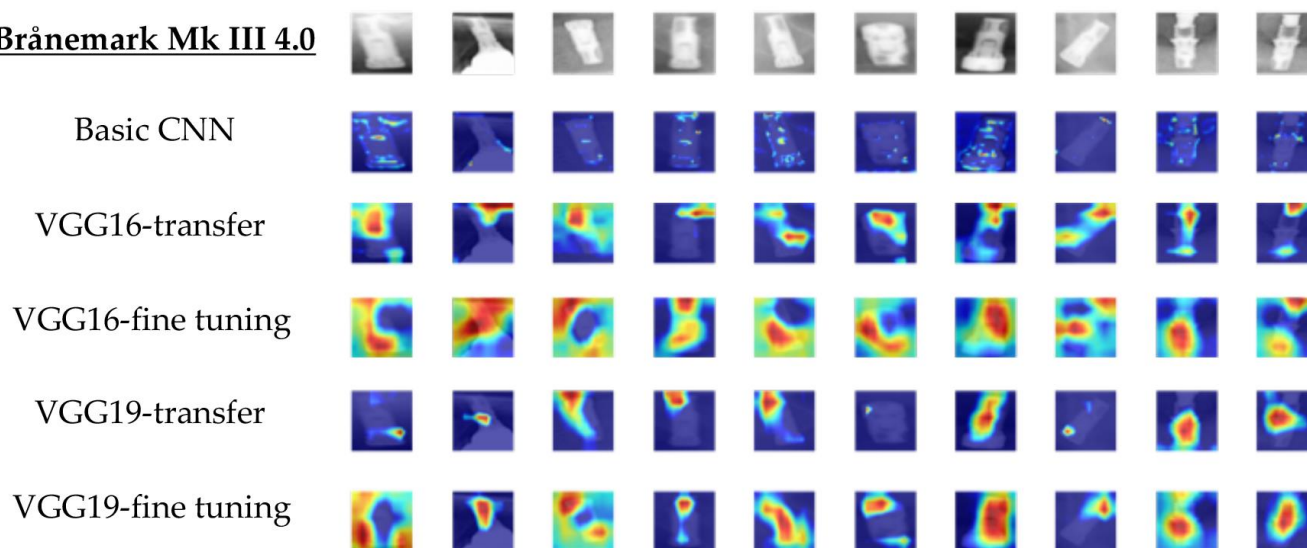

## FINESIA 4.2

### FINESIA 4.2

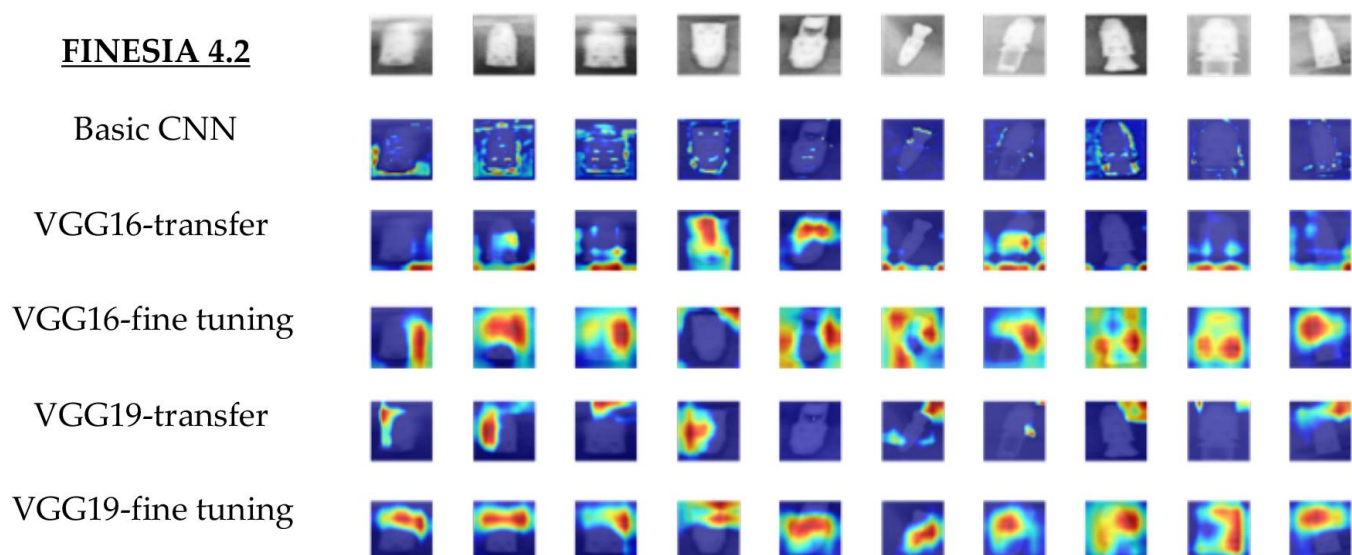

## Replace Select Tapered 4.3

### Replace Select Tapered 4.3

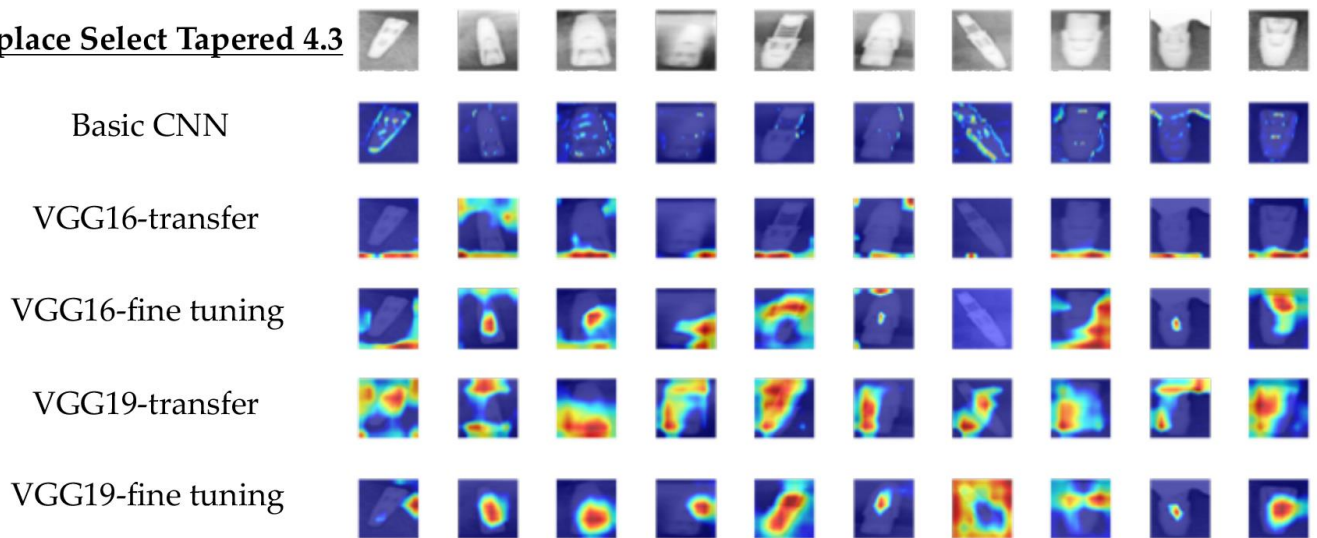

## Nobel Replace CC 4.3

### Nobel CC 4.3

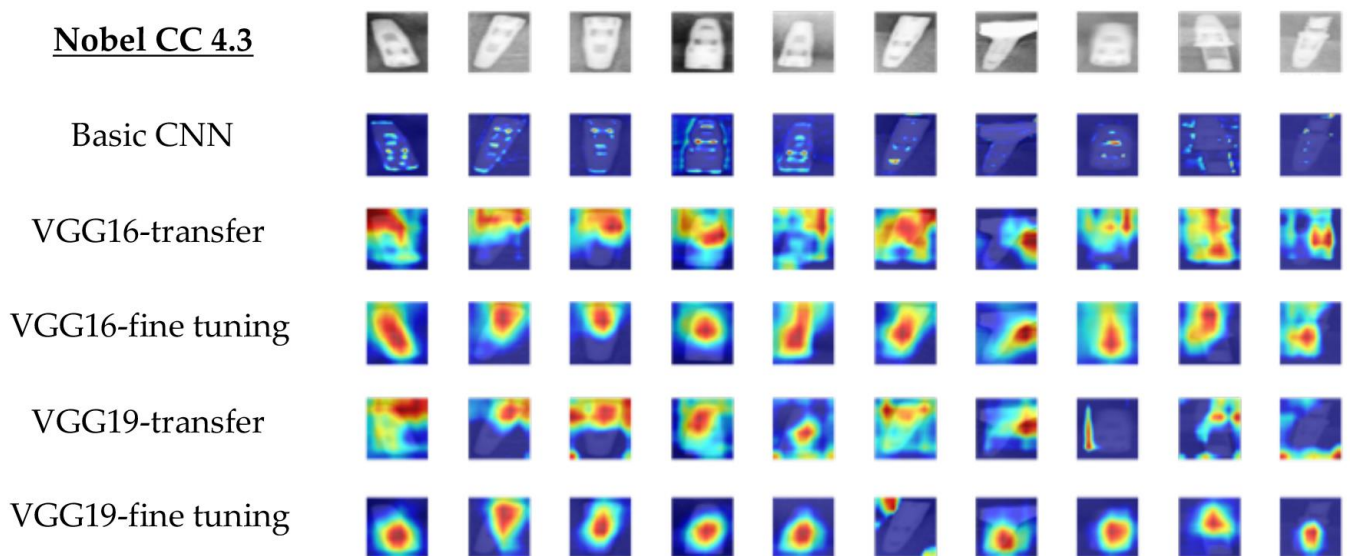

## Strauman Tissue 4.1

### Straumann Tissue 4.1

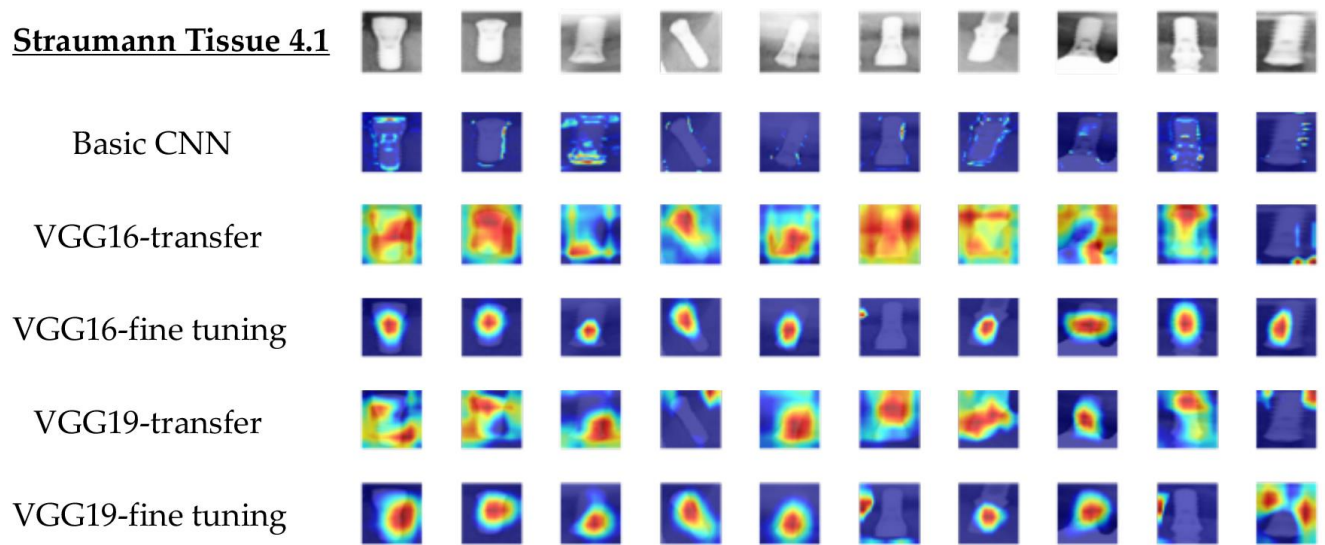

Supplement: s1 [file s1]
